# Supplementary material for: Magnitude and kinetics of multifunctional CD4+ and CD8β+ T cells in pigs infected with swine influenza A virus
Source: PubMed Central journal article supplement (PMC4429459; doi:10.1186/s13567-015-0182-3), 2015-05-14

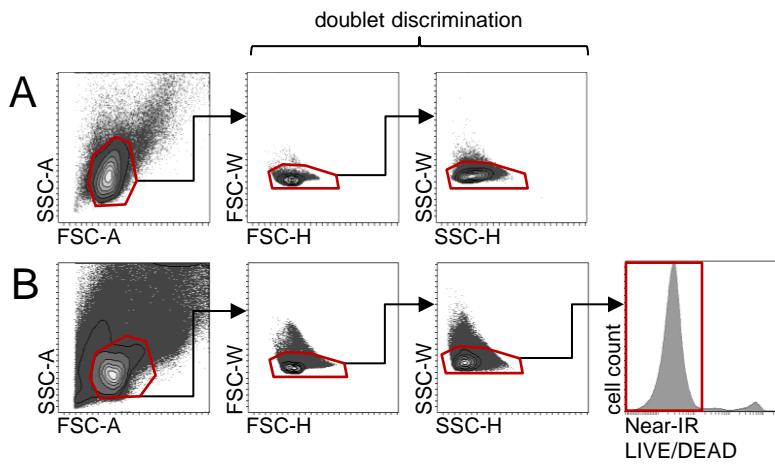

Supplement: 13567_2015_182_MOESM1_ESM.pdf [file 13567_2015_182_MOESM1_ESM.pdf]
