# Supplementary material for: Magnitude and kinetics of multifunctional CD4+ and CD8β+ T cells in pigs infected with swine influenza A virus
Source: PubMed Central journal article supplement (PMC4429459; doi:10.1186/s13567-015-0182-3), 2015-05-14

|               | Boolean Gating |   |        |   |        |   |   |
|---------------|----------------|---|--------|---|--------|---|---|
| IFN- $\gamma$ | +              | - | -      | + | +      | - | + |
| TNF- $\alpha$ | -              | + | -      | + | -      | + | + |
| IL-2          | -              | - | +      | - | +      | + | + |
|               | single         |   | double |   | triple |   |   |

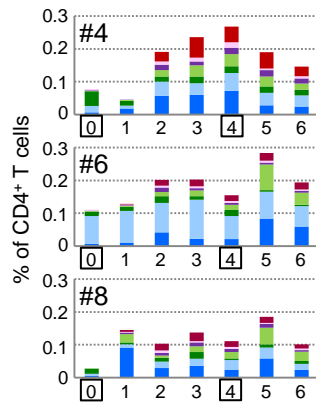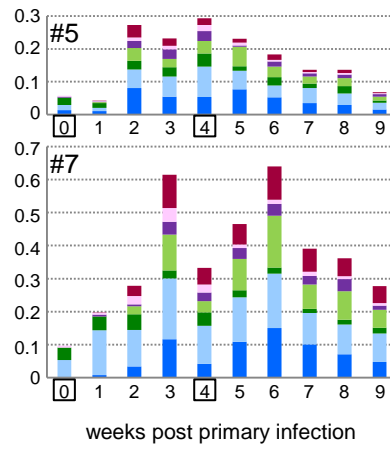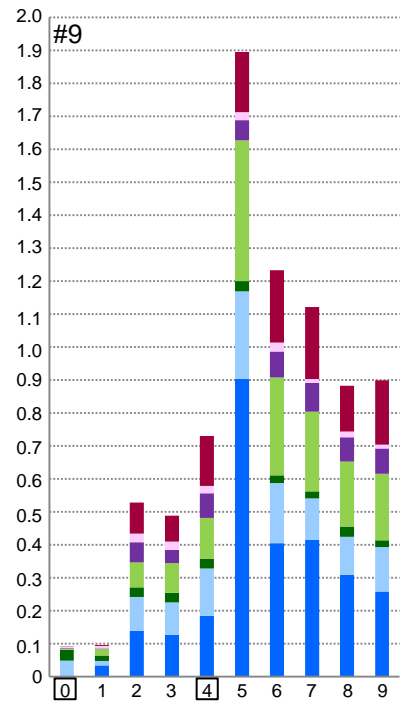

Supplement: 13567_2015_182_MOESM5_ESM.pdf [file 13567_2015_182_MOESM5_ESM.pdf]
