# Supplementary material for: Magnitude and kinetics of multifunctional CD4+ and CD8β+ T cells in pigs infected with swine influenza A virus
Source: PubMed Central journal article supplement (PMC4429459; doi:10.1186/s13567-015-0182-3), 2015-05-14

P...proliferation PITC  
 I...IFN- $\gamma$  PIT PIC PTC CTI  
 T...TNF- $\alpha$  PI PT PC IT IC TC  
 C...CD107a

number of functions  
 4  
 3  
 2

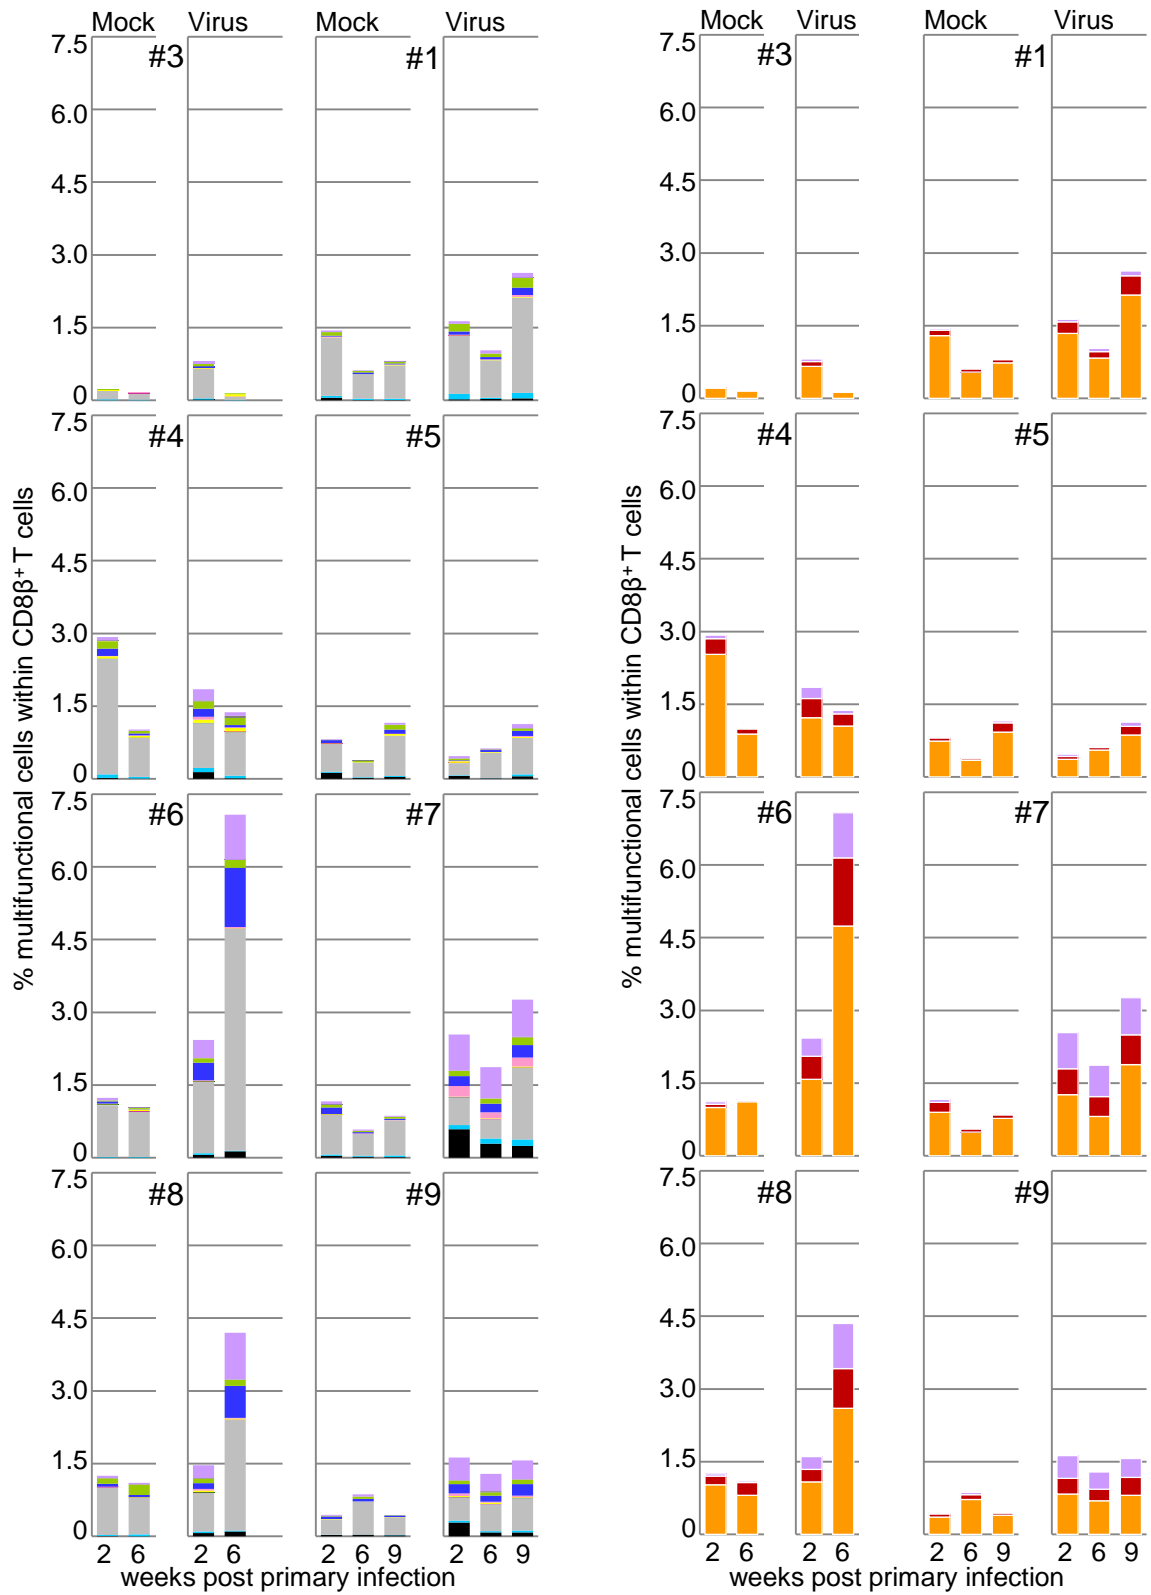

Supplement: 13567_2015_182_MOESM9_ESM.pdf [file 13567_2015_182_MOESM9_ESM.pdf]
